# Supplementary material
Source: publisher figshare collection journal article supplement (https://rs.figshare.com/ndownloader/files/12465197)
Supplement: Supplementary file 1 [file 12465197]

#NEXUS
[written Tue Jun 05 15:13:25 PDT 2018 by Mesquite  version 3.31 (build 859) at jorgeimac.nhm.lac/10.1.20.120]

BEGIN TAXA;
	TITLE Taxa;
	DIMENSIONS NTAX=30;
	TAXLABELS
		Potamotherium_valletoni Enaliarctos_emlongi Pteronarctos_goedertae Pithanotaria_starri Callorhinus_ursinus Desmatophoca_oregonensis Allodesmus_kernensis Erignathus_barbatus Monachus_monachus Mirounga_angustirostris Prototaria_primigena Prototaria_planicephala Proneotherium_repenningi Neotherium_mirum Kamtschatarctos_sinelnikovae Pseudotaria_muramotoi Imagotaria_downsi Pelagiarctos_spp Pontolis_magnus Dusignathus_santacruzensis Dusignathus_seftoni Gomphotaria_pugnax Aivukus_cedrosensis Protodobenus_japonicus Ontocetus_emmonsi Valenictus_chulavistensis Odobenus_rosmarus Archaeodobenus_akamatsui LACM_135920 UABCFCM0072 
	;

END;


BEGIN CHARACTERS;
	TITLE  Character_Matrix;
	DIMENSIONS  NCHAR=91;
	FORMAT DATATYPE = STANDARD GAP = - MISSING = ? SYMBOLS = "  0 1 2 3 4";
	CHARSTATELABELS 
		1 Rostral_process_of_premaxilla /  absent present,
		2 anterior_narial_opening /  'large, thin margin, and rounded' 'large, thick margin, and dorsoventrally elliptical' 'large, thick margin with prenarial shelf',
		3 Ascending_process_of_premaxilla_along_nasal /  'overlap with nasal long, little contact of nasal and maxilla' 'short overlap, no contact of ascending premaxilla and frontal' very_short_overlap,
		4 Nasal_posterior_end /  converging 'parallel with transversely straight frontal/maxillary suture' 'parallel with broad V-shaped frontal/maxillary suture' diverging penetrating_frontal,
		5 Incisive_foramina /  distinct_pair foramina_coalesced trilobed_pits single_pit_or_reduced,
		6 Infraorbital_foramen /  small large,
		7 Ventral_tuberosity_of_zygomatic_root /  absent present,
		8 Anteroventral_process_of_jugal /  moderate 'long, reaching M1' absent,
		9 Palate /  flat arched_tranversely arched_tranversely_and_longitudinally,
		10 Palatal_margin_of_maxilla /  slightly_divergent nearly_parallel posteriorly_very_wide,
		11 Palatine /  small long_and_posterlaterally_expanded telescoped_and_underlying_alisphenoid,
		12 Hamular_process_of_pterygoid /  small_and_narrow large_and_broad,
		13 Pterygoid_strut /  slender dorsoventrally_thin_and_laterally_projected dorsoventrally_thick_and_laterally_broad laterally_thin_and_rolled,
		14 Fossa_muscularis_on_orbital_wall /  present absent,
		15 Antorbital_process /  small_ridge_on_frontal prominent_on_frontal_and_maxilla prominent_only_on_maxilla absent,
		16 Supraorbital_process /  small_bump absent large_and_shelf_like,
		17 Interorbital_bar /  'moderate in width, broader than intertemporal region' 'narrow, parallel sided' very_broad_and_short,
		18 Postorbital_process_of_Jugal /  small dorsally_projected,
		19 Zygomatic_process_of_squamosal /  long_and_slender short_and_slender dorsoventrally_broad exaggerated,
		20 Orbital_vacuity /  absent 'present/anteriorly positioned' 'present/posteriorly positioned',
		21 Optic_foramen_and_orbitosphenoid /  'plate-like' 'funnel-shaped',
		22 Internal_auditory_meatus /  rounded bilobed canals_for_nerves_VII_and_VIII_separated,
		23 Epitympanic_recess /  small large very_large,
		24 Anterior_opening_of_carotid_canal /  proportionate retracted,
		25 Squamosal_fossa_on_external_auditory_meatus /  present reduced,
		26 Glenoid_fossa /  deep shallow laterally_shortened,
		27 Tranverse_ridge_on_squamosal /  absent present,
		28 Pseudosylvian_sulcus /  'present, deep' reduced_or_absent,
		29 Bony_tentorium /  far_from_petrosal appressed_to_petrosal reduced,
		30 Basioccipital /  narrow_and_parallel_sided broad_and_pentagonal,
		31 Posterior_lacerate_foramen /  rounded tranversely_expanded fissure,
		32 Lambdoidal_crest /  'crestlike, posterodorsally directed' 'flattened, anterodorsally directed',
		33 Mastoid_process /  small large very_large_as_widest_part_of_skull pachyostotic,
		34 Paroccipital_process /  small_and_separated_from_mastoid_process enlarged_posteriorly_but_still_separated_from_mastoid_process moderately_sized_and_joined_with_mastoid_process_by_continous_ridge 'flattened and plate-like',
		35 'Mandible: fusion of mandibular symphysis' /  Absent Present,
		36 'Mandible: length of mandibular symphysis' /  Less_than_50%_of_length_of_horizontal_ramus Greater_than_50%_of_length_of_horizontal_ramus,
		37 'Mandible: genial tuberosity' /  Absent_or_indistinct 'present; developed as small tubercle or process on anterior portion of ramus' 'present and well developed; extends well below ventral margin of ramus',
		38 'Mandible: anterior portion of symphyseal region' /  'smooth, compact bone' 'rugose, vascular bone',
		39 'Mandible: horizontal ramus' /  horizontal upturned,
		40 'Mandible: mandibular furrow' /  absent anterodorsal_end_of_mandibles_have_a_longitudinal_furrow_anteriorly,
		41 'Mandible: edentulous mandibular terminus' /  absent present,
		42 'Mandible: posteroventral terminus of mandibular symphysis' /  Same_level_or_anterior_to_p1_or_p2 Posterior_to_the_level_of_p2,
		43 'Mandible: depth of horizontal ramus' /  deepest_part_of_horizontal_ramus_posterior_to_mandibular_symphysis deepest_part_of_horizontal_ramus_at_posteroventral_terminus_of_symphysis,
		44 'Mandible: mandibular arch' /  Nearly_parallel_or_slightly_divergent Sharply_divergent,
		45 'Mandible: ventral border' /  Straight Sinuous,
		46 'Mandible: enlarged digastric insertion' /  Absent Present,
		47 'Mandible: mandibular condyle' /  At_or_slightly_above_level_of_tooth_row Elevated_above_tooth_row,
		48 'Mandible: mandibular foramen' /  Directed_anteroventrally Directed_anterodorsally,
		49 'Mandible: medial shelf of angular process' /  Does_not_form_medial_shelf Forms_small_medial_shelf,
		50 'Mandible: base of coronoid process' /  'narrow (less than 42% of mandible length' 'broad (greater than or equal to 42% of mandible length)',
		51 'Upper Incisors, number' /  3 2 1 upper_incisors_absent,
		52 Upper_I3_proportions /  moderate long_and_slender premolariform absent,
		53 'Lower incisors: number' /  2_incisors 1_incisor incisors_absent,
		54 'Lower Incisors: relative size' /  'lower incisors of equal size, form transverse arcade' 'lateral incisors greater in size than medial incisors, medial incisor placed posteromedial to lateral incisor',
		55 Upper_Canine /  Proportionate 'tusk-like' 'tusk-like with globular osteodentine',
		56 'Lower canines: size compared to upper canines' /  'Nearly equal (100-80%) and caniniform' 'reduced (75-20%) and premolariform' lower_canine_absent,
		57 'Lower canine: posterior crista' /  present absent,
		58 'Lower canines: longitudinal fluting' /  Absent Present,
		59 'Lower canines: root' /  Oval_or_circular_in_cross_section Bilobate_in_cross_section_or_prominent_longitudinal_labial_sulcus,
		60 'Lower canines: orientation' /  Not_procumbent_and_vertically_oriented Procumbent,
		61 Lower_premolars /  'p1-4 present' 'p1-3 present, p4 absent' premolars_absent,
		62 'Postcanines: tooth enamel' /  Well_developed Thin_or_patchy Cementum_only,
		63 'Postcanines: crowns' /  Laterally_compressed Bulbous,
		64 'Postcanines: root lobes' /  Root_lobes_of_postcanine_teeth_of_equal_or_narrower_width_than_crowns Root_lobes_of_postcanine_teeth_inflated_and_wider_than_crowns,
		65 'Lower postcanines: tooth row length' /  'long (length of toothrow greater than 40% of the mandible length)' 'short (length of toothrow less than or equal to 40% of the mandible length)',
		66 'Lower postcanines: paraconid cusps' /  Present_and_well_developed Absent_or_reduced,
		67 'Lower postcanines: lingual cingula' /  Present_and_smooth Present_and_rough_or_crenulated.,
		68 'Lower premolars: hypoconid cusps' /  Present Absent,
		69 'Lower postcanines: talonid basin' /  Absent Slight_concavity_or_small_shelf,
		70 'Lower postcanines: metaconid' /  Present Reduced Absent,
		71 'Upper P1-2, cingulum' /  distinct_but_small well_developed_with_cuspules weak_and_bulbous 'P1-P2 absent',
		72 'Lower P2: rooting' /  Double_or_bilobate Single,
		73 'Lower P3-4: rooting' /  Double Single,
		74 'Upper P3, roots' /  double_rooted single_and_bilobed single_and_cylindrical P3_absent,
		75 'Upper P4, protocone shelf' /  anteromedially_placed posteromedially_placed_with_small_cuspules reduced_or_absent,
		76 'Upper P4, roots' /  triple_rooted double_rooted single_rooted P4_absent,
		77 'Upper M1, roots' /  triple_rooted double_rooted single_rooted M1_absent,
		78 Lower_M1 /  Present Absent,
		79 'Lower M1: rooting' /  Double_rooted Single_rooted,
		80 'Upper M2, roots' /  double_rooted single_rooted M2_absent,
		81 Lower_M2 /  Present Absent,
		82 Postcanine_tooth_wear /  Absent Minor_wear_on_anterior_and_posterior_cusps_or_apical_wear Large_wear_facets_on_anterior_and_posterior_edges Heavily_worn_and_polished,
		83 'Humerus, deltoid tubercle' /  on_pectoral_crest on_lateral_edge_of_crest off_crest,
		84 'Humerus, diameter of distal trochlea' /  medial_lip_same_or_smaller_diameter_as_distal_capitulum medial_lip_diameter_greater_than_distal_capitulum,
		85 'Radius, distal end' /  unexpanded expanded_with_small_radial_process expanded_with_large_radial_process,
		86 'Metacarpal I, insertion of pollicle extensor' /  smooth pit rugosity,
		87 Scapholunar /  no_pit_for_magnum 'well-formed_pit',
		88 'Astragalus, calcaneal process' /  absent present elongated,
		89 'Calcaneum, calcaneal tuber' /  straight medially_prominent,
		90 'Entocuneiform/mesocuneiform articulation' /  abutting overlapping,
		91 'Spinous process, axis' /  'axe-like' 'blade-like' sigmoidal ; 
	MATRIX
	Potamotherium_valletoni       000000000010013000000000000020000000000000000000100010000?0000000000200000000101010000-10--
	Enaliarctos_emlongi           1000000000000000000001000000000000000000000000000000000000000000000000000000100100????????0
	Pteronarctos_goedertae        100000100000000000000?0000000000020010000000000000000000000000001000000000111001000???????0
	Pithanotaria_starri           1??30000010?0??2?001?0001001????0?0010000110(0 1)00010000000000000001101020000211001(0 1)00010?000?
	Callorhinus_ursinus           1003000001000122000100001001000002000000001000011?00000000000000110102011122201110001000000
	Desmatophoca_oregonensis      00241001{0 1}2101130112001210000000001001000001001001001010000000000100001100021{1 2}0010000???????
	Allodesmus_kernensis          02242001{0 1}21011301120012101010{0 1}100100100001101101000101000000001111010221122220110100100111{0 1}
	Erignathus_barbatus           10240012020031211130022002012020300010000{0 1}000110000000000000000010000000002110021{1 3}001002000
	Monachus_monachus             002400020200312111310220020120103000000000100100011000000000000010100000002110021100100200?
	Mirounga_angustirostris       0024100202003121113202?012012010300111000010011001100000?000000011000?01122220121100100200?
	Prototaria_primigena          110010000000201000010--00010-00002????????????????00??0???????????????-??0-10??2???????????
	Prototaria_planicephala       -100001010002010000101100010100012????????????????-0??0???????????????-??0-10??1???????????
	Proneotherium_repenningi      110000100000211000110??00000?00002000000001000001000000000000000100000100011000101?????111?
	Neotherium_mirum              11100010001021111011011000001000030010000010000110000000001000001000111000110000010121111??
	Kamtschatarctos_sinelnikovae  ?????0??0?102???101??????0????????00100?0010000?10??????????0000100011?00???000001?????????
	Pseudotaria_muramotoi         ??100010101021101??101100001100003?????????????????0??0??????????????????0?11??0??????????0
	Imagotaria_downsi             11100000101021111011011001011100130120000010{0 1}00110{0 1}0010000100010101{0 1}121{0 1}{0 1}111100{0 1}{0 1}10121111??
	Pelagiarctos_spp              ??????????????????????????????????(0 1)12100001000??????01?000100010?01011?00????00?01?????????
	Pontolis_magnus               11120000101001111011011001011100130021000110111001001?00100001111100121001?210000201?11111?
	Dusignathus_santacruzensis    ??????????????????1???1?010?1??01?0120000111110010?00110100101111101122112???01?120111?????
	Dusignathus_seftoni           1112211010???11120110?1?01011?00131121000{0 1}11110010{0 1}01?10110101111?????21122220111?012??11??
	Gomphotaria_pugnax            11120000101??11120110???0101?1?00?0111000110000010112?10110111111?0???21122220111301211111?
	Aivukus_cedrosensis           1121011010???111211??11011011???130??000?0?00?????12??00??0002????????21122220121301221????
	Protodobenus_japonicus        1121?1??202121?12????????101?1????01000000111010100001211000011011010221122221?211?????????
	Ontocetus_emmonsi             112221102021211121121110110111012301211011110110101201211000021011010221122221?2111122111??
	Valenictus_chulavistensis     112201102021211121121?101101?101231111111?11011000332?22????1?????????3??3?331?21?212211111
	Odobenus_rosmarus             11213110202121112112111011011101231111011011011111222?211000221011010221122331?213212211111
	Archaeodobenus_akamatsui      1???001?10102????01??1?0000111?003012000001100011000010000000011101?011000111000010???????1
	LACM_135920                   ??????????????????????????????????0010000010????????????10000??0???????00????01??3?????????
	UABCFCM0072                   ??????????????????????????????????002000011010????????????1?0010?0000??00????00?01??????1??

;

END;
BEGIN ASSUMPTIONS;
	TYPESET * UNTITLED   =  unord:  1 -  91;

END;

BEGIN MESQUITECHARMODELS;
	ProbModelSet * UNTITLED   =  'Mk1 (est.)':  1 -  91;
END;

Begin MESQUITE;
		MESQUITESCRIPTVERSION 2;
		TITLE AUTO;
		tell ProjectCoordinator;
		timeSaved 1528236805686;
		getEmployee #mesquite.minimal.ManageTaxa.ManageTaxa;
		tell It;
			setID 0 2992612874794536229;
		endTell;
		getEmployee #mesquite.charMatrices.ManageCharacters.ManageCharacters;
		tell It;
			setID 0 7523379954182652773;
			mqVersion 331;
			checksumv 0 3 3488597934 null  getNumChars 91 numChars 91 getNumTaxa 30 numTaxa 30   short true   bits 2305843009213693983   states 31   sumSquaresStatesOnly 10997.0 sumSquares -8.301034833169298E19 longCompressibleToShort false usingShortMatrix true   NumFiles 1 NumMatrices 1;
			mqVersion;
		endTell;
		getWindow;
		tell It;
			suppress;
			setResourcesState false false 191;
			setPopoutState 300;
			setExplanationSize 0;
			setAnnotationSize 0;
			setFontIncAnnot 0;
			setFontIncExp 0;
			setSize 1828 759;
			setLocation 449 273;
			setFont SanSerif;
			setFontSize 10;
			getToolPalette;
			tell It;
			endTell;
			desuppress;
		endTell;
		getEmployee  #mesquite.charMatrices.BasicDataWindowCoord.BasicDataWindowCoord;
		tell It;
			showDataWindow #7523379954182652773 #mesquite.charMatrices.BasicDataWindowMaker.BasicDataWindowMaker;
			tell It;
				getWindow;
				tell It;
					setExplanationSize 30;
					setAnnotationSize 20;
					setFontIncAnnot 0;
					setFontIncExp 0;
					setSize 1637 687;
					setLocation 449 273;
					setFont SanSerif;
					setFontSize 10;
					getToolPalette;
					tell It;
						setTool mesquite.charMatrices.BasicDataWindowMaker.BasicDataWindow.ibeam;
					endTell;
					setActive;
					setTool mesquite.charMatrices.BasicDataWindowMaker.BasicDataWindow.ibeam;
					colorCells  #mesquite.charMatrices.NoColor.NoColor;
					colorRowNames  #mesquite.charMatrices.TaxonGroupColor.TaxonGroupColor;
					colorColumnNames  #mesquite.charMatrices.CharGroupColor.CharGroupColor;
					colorText  #mesquite.charMatrices.NoColor.NoColor;
					setBackground White;
					toggleShowNames off;
					toggleShowTaxonNames on;
					toggleTight off;
					toggleThinRows off;
					toggleShowChanges on;
					toggleSeparateLines off;
					toggleShowStates on;
					toggleAutoWCharNames on;
					toggleAutoTaxonNames off;
					toggleShowDefaultCharNames off;
					toggleConstrainCW on;
					toggleBirdsEye off;
					toggleShowPaleGrid off;
					toggleShowPaleCellColors off;
					toggleShowPaleExcluded off;
					togglePaleInapplicable on;
					toggleShowBoldCellText off;
					toggleAllowAutosize on;
					toggleColorsPanel off;
					toggleDiagonal on;
					setDiagonalHeight 80;
					toggleLinkedScrolling on;
					toggleScrollLinkedTables off;
				endTell;
				showWindow;
				getWindow;
				tell It;
					forceAutosize;
				endTell;
				getEmployee #mesquite.charMatrices.AlterData.AlterData;
				tell It;
					toggleBySubmenus off;
				endTell;
				getEmployee #mesquite.charMatrices.ColorByState.ColorByState;
				tell It;
					setStateLimit 9;
					toggleUniformMaximum on;
				endTell;
				getEmployee #mesquite.charMatrices.ColorCells.ColorCells;
				tell It;
					setColor Red;
					removeColor off;
				endTell;
				getEmployee #mesquite.categ.StateNamesEditor.StateNamesEditor;
				tell It;
					makeWindow;
					tell It;
						setExplanationSize 30;
						setAnnotationSize 20;
						setFontIncAnnot 0;
						setFontIncExp 0;
						setSize 1637 687;
						setLocation 449 273;
						setFont SanSerif;
						setFontSize 10;
						getToolPalette;
						tell It;
							setTool mesquite.categ.StateNamesEditor.StateNamesWindow.ibeam;
						endTell;
						rowsAreCharacters on;
						toggleConstrainChar on;
						toggleConstrainCharNum 3;
						togglePanel off;
						toggleSummaryPanel off;
					endTell;
					showWindow;
				endTell;
				getEmployee #mesquite.categ.StateNamesStrip.StateNamesStrip;
				tell It;
					showStrip off;
				endTell;
				getEmployee #mesquite.charMatrices.AnnotPanel.AnnotPanel;
				tell It;
					togglePanel off;
				endTell;
				getEmployee #mesquite.charMatrices.CharReferenceStrip.CharReferenceStrip;
				tell It;
					showStrip off;
				endTell;
				getEmployee #mesquite.charMatrices.QuickKeySelector.QuickKeySelector;
				tell It;
					autotabOff;
				endTell;
				getEmployee #mesquite.charMatrices.SelSummaryStrip.SelSummaryStrip;
				tell It;
					showStrip off;
				endTell;
				getEmployee #mesquite.categ.SmallStateNamesEditor.SmallStateNamesEditor;
				tell It;
					panelOpen true;
				endTell;
			endTell;
		endTell;
		endTell;
end;
